# Supplementary material for: Complete Metamorphosis in Manduca sexta Involves Specific Changes in DNA Methylation Patterns
Source: Frontiers journal article supplement (doi:10.3389/fevo.2021.646281), 2021-03-11
Supplement: Table_1.XLSX [file Table_1.XLSX]

## Sheet: Tabelle1
Table S7 Genes of interest.
Number	Name	Function	Gene class	Reference
Msex2.14083	MsCHS1	Chitin synthase	Chitin metabolism	1
Msex2.06544	MsCHS2	Chitin synthase	Chitin metabolism	1
Msex2.03153	MsCDA1	Chitin deacetylase	Chitin metabolism	1
Msex2.03152	MsCDA2	Chitin deacetylase	Chitin metabolism	1
Msex2.02612	MsCDA3	Chitin deacetylase	Chitin metabolism	1
Msex2.02671	MsCDA4	Chitin deacetylase	Chitin metabolism	1
Msex2.03714	MsCDA5	Chitin deacetylase	Chitin metabolism	1
Msex2.08537	MsCDA6	Chitin deacetylase	Chitin metabolism	1
Msex2.08536	MsCDA7	Chitin deacetylase	Chitin metabolism	1
Msex2.08538	MsCDA8	Chitin deacetylase	Chitin metabolism	1
Msex2.08539	MsCDA9	Chitin deacetylase	Chitin metabolism	1
Msex2.02611	MsCHT1	Chitinase	Chitin metabolism	1
Msex2.03860	MsCHT2	Chitinase	Chitin metabolism	1
Msex2.04654	MsCHT3	Chitinase	Chitin metabolism	1
Msex2.08301	MsCHT5	Chitinase	Chitin metabolism	1
Msex2.07800	MsCHT6	Chitinase	Chitin metabolism	1
Msex2.03556	MsCHT7	Chitinase	Chitin metabolism	1
Msex2.10627	MsCHT8	Chitinase	Chitin metabolism	1
Msex2.04970	MsCHT10	Chitinase	Chitin metabolism	1
Msex2.12654	MsCHT11	Chitinase	Chitin metabolism	1
Msex2.02783	MsCHT-h	Chitinase	Chitin metabolism	1
Msex2.03419	MsIDGF1	Chitinase-like	Chitin metabolism	2
Msex2.13160	MsCPAP1-A	Chitin-binding protein	Chitin metabolism	2
Msex2.00613	MsCPAP1-B1	Chitin-binding protein	Chitin metabolism	2
Msex2.00614	MsCPAP1-B2	Chitin-binding protein	Chitin metabolism	2
Msex2.00381	MsCPAP1-C	Chitin-binding protein	Chitin metabolism	2
Msex2.03859	MsCPAP1-D	Chitin-binding protein	Chitin metabolism	2
Msex2.02135	MsCPAP1-F	Chitin-binding protein	Chitin metabolism	2
Msex2.00269	MsCPAP1-G	Chitin-binding protein	Chitin metabolism	2
Msex2.02134	MsCPAP1-H	Chitin-binding protein	Chitin metabolism	2
Msex2.03076	MsCPAP1-I	Chitin-binding protein	Chitin metabolism	2
Msex2.03236	MsCPAP1-J	Chitin-binding protein	Chitin metabolism	2
Msex2.01703	MsCPAP1-K	Chitin-binding protein	Chitin metabolism	2
Msex2.09867	MsCPAP1-L	Chitin-binding protein	Chitin metabolism	2
Msex2.03103	MsCPAP1-M	Chitin-binding protein	Chitin metabolism	2
Msex2.02137	MsCPAP1-N	Chitin-binding protein	Chitin metabolism	2
Msex2.08722	MsCPAP1-O	Chitin-binding protein	Chitin metabolism	2
Msex2.08805	MsCPAP3-A1	Chitin-binding protein	Chitin metabolism	2
Msex2.08806	MsCPAP3-A2	Chitin-binding protein	Chitin metabolism	2
Msex2.08808	MsCPAP3-B	Chitin-binding protein	Chitin metabolism	2
Msex2.15015	MsCPAP3-B	Chitin-binding protein	Chitin metabolism	2
Msex2.08810	MsCPAP3-C	Chitin-binding protein	Chitin metabolism	2
Msex2.08807	MsCPAP3-D1	Chitin-binding protein	Chitin metabolism	2
Msex2.04890	MsCPAP3-D2	Chitin-binding protein	Chitin metabolism	2
Msex2.03293	MsCPAP3-E1	Chitin-binding protein	Chitin metabolism	2
Msex2.03294	MsCPAP3-E2	Chitin-binding protein	Chitin metabolism	2
Msex2.03295	MsCPAP3-E3	Chitin-binding protein	Chitin metabolism	2
Msex2.14886	MsCPAP3-E4	Chitin-binding protein	Chitin metabolism	2
Msex2.03475	MsPMP1-A	Chitin-binding protein	Chitin metabolism	2
Msex2.05978	MsPMP1-B	Chitin-binding protein	Chitin metabolism	2
Msex2.11773	MsPMP1-C	Chitin-binding protein	Chitin metabolism	2
Msex2.11956	MsPMP1-D	Chitin-binding protein	Chitin metabolism	2
Msex2.15494	MsPMP1-E	Chitin-binding protein	Chitin metabolism	2
Msex2.05420	MsPMP1-F	Chitin-binding protein	Chitin metabolism	2
Msex2.04630	MsPMP2-A	Chitin-binding protein	Chitin metabolism	2
Msex2.08809	MsPMP2-B	Chitin-binding protein	Chitin metabolism	2
Msex2.09613	MsPMP2-C	Chitin-binding protein	Chitin metabolism	2
Msex2.04629	MsPMP3-A	Chitin-binding protein	Chitin metabolism	2
Msex2.05974	MsPMP3-B	Chitin-binding protein	Chitin metabolism	2
Msex2.05986	MsPMP4	Chitin-binding protein	Chitin metabolism	2
Msex2.04627	MsPMP5	Chitin-binding protein	Chitin metabolism	2
Msex2.05971	MsPMP8	Chitin-binding protein	Chitin metabolism	2
Msex2.00706	MsPMP9-A	Chitin-binding protein	Chitin metabolism	2
Msex2.05985	MsPMP9-B	Chitin-binding protein	Chitin metabolism	2
Msex2.02712	MsPMP14	Chitin-binding protein	Chitin metabolism	2
Msex2.03567	A	ABC transporter	Detoxification	3
Msex2.03568	A	ABC transporter	Detoxification	3
Msex2.04170	A	ABC transporter	Detoxification	3
Msex2.12351	A	ABC transporter	Detoxification	3
Msex2.12147	A3	ABC transporter	Detoxification	3
Msex2.01581	A5	ABC transporter	Detoxification	3
Msex2.03566	A7	ABC transporter	Detoxification	3
Msex2.09773	B1	ABC transporter	Detoxification	3
Msex2.09106	B2	ABC transporter	Detoxification	3
Msex2.09107	B3	ABC transporter	Detoxification	3
Msex2.08166	B4	ABC transporter	Detoxification	3
Msex2.07270	B5	ABC transporter	Detoxification	3
Msex2.08825	B6	ABC transporter	Detoxification	3
Msex2.11947	B7	ABC transporter	Detoxification	3
Msex2.10064	B8	ABC transporter	Detoxification	3
Msex2.12844	B9	ABC transporter	Detoxification	3
Msex2.13266	brown	ABC transporter	Detoxification	3
Msex2.12678	C1	ABC transporter	Detoxification	3
Msex2.07869	C10	ABC transporter	Detoxification	3
Msex2.07664	C11	ABC transporter	Detoxification	3
Msex2.12679	C2	ABC transporter	Detoxification	3
Msex2.06707	C3	ABC transporter	Detoxification	3
Msex2.15134	C4	ABC transporter	Detoxification	3
Msex2.11130	C5	ABC transporter	Detoxification	3
Msex2.09797	C6	ABC transporter	Detoxification	3
Msex2.15061	C7	ABC transporter	Detoxification	3
Msex2.08194	C8	ABC transporter	Detoxification	3
Msex2.04981	C9	ABC transporter	Detoxification	3
Msex2.04213	D1	ABC transporter	Detoxification	3
Msex2.05212	D1	ABC transporter	Detoxification	3
Msex2.11687	D2	ABC transporter	Detoxification	3
Msex2.15073	D2	ABC transporter	Detoxification	3
Msex2.09295	E1	ABC transporter	Detoxification	3
Msex2.10395	F1	ABC transporter	Detoxification	3
Msex2.06970	F2	ABC transporter	Detoxification	3
Msex2.13929	F3	ABC transporter	Detoxification	3
Msex2.02789	G	ABC transporter	Detoxification	3
Msex2.02920	G	ABC transporter	Detoxification	3
Msex2.02921	G	ABC transporter	Detoxification	3
Msex2.09851	G	ABC transporter	Detoxification	3
Msex2.11695	G	ABC transporter	Detoxification	3
Msex2.12541	G	ABC transporter	Detoxification	3
Msex2.12701	G	ABC transporter	Detoxification	3
Msex2.11196	G1	ABC transporter	Detoxification	3
Msex2.13803	G2	ABC transporter	Detoxification	3
Msex2.02959	G3	ABC transporter	Detoxification	3
Msex2.12542	G4	ABC transporter	Detoxification	3
Msex2.10847	G5	ABC transporter	Detoxification	3
Msex2.13212	G8	ABC transporter	Detoxification	3
Msex2.05814	H	ABC transporter	Detoxification	3
Msex2.05815	H	ABC transporter	Detoxification	3
Msex2.09200	H	ABC transporter	Detoxification	3
Msex2.01020	scarlet	ABC transporter	Detoxification	3
Msex2.01019	white	ABC transporter	Detoxification	3
Msex2.10327	CYP15A	Cytochrome P450	Detoxification	3
Msex2.05506	CYP18A	Cytochrome P450	Detoxification	3
Msex2.05508	CYP18A	Cytochrome P450	Detoxification	3
Msex2.07259	CYP301A	Cytochrome P450	Detoxification	3
Msex2.04412	CYP302A	Cytochrome P450	Detoxification	3
Msex2.03681	CYP303A	Cytochrome P450	Detoxification	3
Msex2.08007	CYP304F	Cytochrome P450	Detoxification	3
Msex2.07399	CYP305B	Cytochrome P450	Detoxification	3
Msex2.05509	CYP306A	Cytochrome P450	Detoxification	3
Msex2.11402	CYP307A	Cytochrome P450	Detoxification	3
Msex2.15113	CYP307A	Cytochrome P450	Detoxification	3
Msex2.08297	CYP314A	Cytochrome P450	Detoxification	3
Msex2.06640	CYP315A	Cytochrome P450	Detoxification	3
Msex2.04085	CYP321A	Cytochrome P450	Detoxification	3
Msex2.07561	CYP324A	Cytochrome P450	Detoxification	3
Msex2.07562	CYP324A	Cytochrome P450	Detoxification	3
Msex2.07563	CYP324A	Cytochrome P450	Detoxification	3
Msex2.03303	CYP332A	Cytochrome P450	Detoxification	3
Msex2.03304	CYP332A	Cytochrome P450	Detoxification	3
Msex2.03305	CYP332A	Cytochrome P450	Detoxification	3
Msex2.01872	CYP333A3	Cytochrome P450	Detoxification	3
Msex2.10889	CYP333B	Cytochrome P450	Detoxification	3
Msex2.10890	CYP333B	Cytochrome P450	Detoxification	3
Msex2.10891	CYP333B	Cytochrome P450	Detoxification	3
Msex2.10893	CYP333B	Cytochrome P450	Detoxification	3
Msex2.10895	CYP333B	Cytochrome P450	Detoxification	3
Msex2.10896	CYP333B	Cytochrome P450	Detoxification	3
Msex2.13553	CYP333B	Cytochrome P450	Detoxification	3
Msex2.15162	CYP333B	Cytochrome P450	Detoxification	3
Msex2.10894	CYP333B11	Cytochrome P450	Detoxification	3
Msex2.01467	CYP337A	Cytochrome P450	Detoxification	3
Msex2.09894	CYP337A	Cytochrome P450	Detoxification	3
Msex2.01466	CYP337B	Cytochrome P450	Detoxification	3
Msex2.05754	CYP338A	Cytochrome P450	Detoxification	3
Msex2.01198	CYP339A	Cytochrome P450	Detoxification	3
Msex2.04950	CYP340A	Cytochrome P450	Detoxification	3
Msex2.04951	CYP340A	Cytochrome P450	Detoxification	3
Msex2.14593	CYP340C	Cytochrome P450	Detoxification	3
Msex2.14600	CYP340C	Cytochrome P450	Detoxification	3
Msex2.06102	CYP341A	Cytochrome P450	Detoxification	3
Msex2.09933	CYP341B	Cytochrome P450	Detoxification	3
Msex2.09935	CYP341B	Cytochrome P450	Detoxification	3
Msex2.11907	CYP341B	Cytochrome P450	Detoxification	3
Msex2.11908	CYP341B	Cytochrome P450	Detoxification	3
Msex2.11909	CYP341B	Cytochrome P450	Detoxification	3
Msex2.13820	CYP341B	Cytochrome P450	Detoxification	3
Msex2.14281	CYP341B	Cytochrome P450	Detoxification	3
Msex2.01884	CYP354A5	Cytochrome P450	Detoxification	3
Msex2.12312	CYP366D	Cytochrome P450	Detoxification	3
Msex2.15204	CYP366D	Cytochrome P450	Detoxification	3
Msex2.05089	CYP367B	Cytochrome P450	Detoxification	3
Msex2.00093	CYP428A	Cytochrome P450	Detoxification	3
Msex2.05854	CYP49A	Cytochrome P450	Detoxification	3
Msex2.07258	CYP49A	Cytochrome P450	Detoxification	3
Msex2.01638	CYP4AU	Cytochrome P450	Detoxification	3
Msex2.01639	CYP4AU	Cytochrome P450	Detoxification	3
Msex2.04949	CYP4C	Cytochrome P450	Detoxification	3
Msex2.04952	CYP4C	Cytochrome P450	Detoxification	3
Msex2.04955	CYP4C	Cytochrome P450	Detoxification	3
Msex2.05090	CYP4C	Cytochrome P450	Detoxification	3
Msex2.09934	CYP4C	Cytochrome P450	Detoxification	3
Msex2.13515	CYP4C	Cytochrome P450	Detoxification	3
Msex2.13589	CYP4C	Cytochrome P450	Detoxification	3
Msex2.02933	CYP4CG	Cytochrome P450	Detoxification	3
Msex2.02935	CYP4CG	Cytochrome P450	Detoxification	3
Msex2.02936	CYP4CG1	Cytochrome P450	Detoxification	3
Msex2.05640	CYP4G	Cytochrome P450	Detoxification	3
Msex2.05642	CYP4G	Cytochrome P450	Detoxification	3
Msex2.04540	CYP4G4	Cytochrome P450	Detoxification	3
Msex2.05641	CYP4G49	Cytochrome P450	Detoxification	3
Msex2.13552	CYP4L	Cytochrome P450	Detoxification	3
Msex2.10034	CYP4M	Cytochrome P450	Detoxification	3
Msex2.10036	CYP4M	Cytochrome P450	Detoxification	3
Msex2.10033	CYP4M1	Cytochrome P450	Detoxification	3
Msex2.10035	CYP4M2	Cytochrome P450	Detoxification	3
Msex2.06452	CYP4S	Cytochrome P450	Detoxification	3
Msex2.06453	CYP4S	Cytochrome P450	Detoxification	3
Msex2.01282	CYP6A	Cytochrome P450	Detoxification	3
Msex2.08561	CYP6AB	Cytochrome P450	Detoxification	3
Msex2.08562	CYP6AB	Cytochrome P450	Detoxification	3
Msex2.11700	CYP6AB13	Cytochrome P450	Detoxification	3
Msex2.06392	CYP6AE	Cytochrome P450	Detoxification	3
Msex2.11047	CYP6AE	Cytochrome P450	Detoxification	3
Msex2.11048	CYP6AE	Cytochrome P450	Detoxification	3
Msex2.13219	CYP6AE	Cytochrome P450	Detoxification	3
Msex2.13220	CYP6AE	Cytochrome P450	Detoxification	3
Msex2.13221	CYP6AE	Cytochrome P450	Detoxification	3
Msex2.13906	CYP6AE	Cytochrome P450	Detoxification	3
Msex2.14778	CYP6AE	Cytochrome P450	Detoxification	3
Msex2.10215	CYP6AE31	Cytochrome P450	Detoxification	3
Msex2.13217	CYP6AE32	Cytochrome P450	Detoxification	3
Msex2.11774	CYP6AN	Cytochrome P450	Detoxification	3
Msex2.11957	CYP6AN	Cytochrome P450	Detoxification	3
Msex2.13295	CYP6AN	Cytochrome P450	Detoxification	3
Msex2.13294	CYP6AN5	Cytochrome P450	Detoxification	3
Msex2.06944	CYP6AU	Cytochrome P450	Detoxification	3
Msex2.09027	CYP6AX	Cytochrome P450	Detoxification	3
Msex2.02492	CYP6B	Cytochrome P450	Detoxification	3
Msex2.06945	CYP6B	Cytochrome P450	Detoxification	3
Msex2.02491	CYP6B45	Cytochrome P450	Detoxification	3
Msex2.13751	CYP6BD	Cytochrome P450	Detoxification	3
Msex2.14397	CYP6BD	Cytochrome P450	Detoxification	3
Msex2.14567	CYP6BD	Cytochrome P450	Detoxification	3
Msex2.14709	CYP6BD	Cytochrome P450	Detoxification	3
Msex2.15240	CYP6BD	Cytochrome P450	Detoxification	3
Msex2.15476	CYP6BD	Cytochrome P450	Detoxification	3
Msex2.08108	CYP6CT	Cytochrome P450	Detoxification	3
Msex2.10760	CYP9A	Cytochrome P450	Detoxification	3
Msex2.11778	CYP9A	Cytochrome P450	Detoxification	3
Msex2.11779	CYP9A	Cytochrome P450	Detoxification	3
Msex2.11790	CYP9A	Cytochrome P450	Detoxification	3
Msex2.11791	CYP9A	Cytochrome P450	Detoxification	3
Msex2.09686	CYP9AJ	Cytochrome P450	Detoxification	3
Msex2.11105	CYP9G	Cytochrome P450	Detoxification	3
Msex2.11106	CYP9G	Cytochrome P450	Detoxification	3
Msex2.11107	CYP9G	Cytochrome P450	Detoxification	3
Msex2.11862	Delta1	Glutathione S-transferase	Detoxification	3
Msex2.11863	Delta2	Glutathione S-transferase	Detoxification	3
Msex2.08504	Delta3	Glutathione S-transferase	Detoxification	3
Msex2.08503	Delta4	Glutathione S-transferase	Detoxification	3
Msex2.00809	Delta5	Glutathione S-transferase	Detoxification	3
Msex2.00537	Delta-OLF1	Glutathione S-transferase	Detoxification	3
Msex2.00538	Delta-OLF2	Glutathione S-transferase	Detoxification	3
Msex2.15517	Epsilon1	Glutathione S-transferase	Detoxification	3
Msex2.05056	Epsilon2	Glutathione S-transferase	Detoxification	3
Msex2.04941	Epsilon3	Glutathione S-transferase	Detoxification	3
Msex2.08396	Epsilon4	Glutathione S-transferase	Detoxification	3
Msex2.02751	Epsilon5a	Glutathione S-transferase	Detoxification	3
Msex2.02752	Epsilon5b	Glutathione S-transferase	Detoxification	3
Msex2.15508	Epsilon6a	Glutathione S-transferase	Detoxification	3
Msex2.02753	Epsilon6b	Glutathione S-transferase	Detoxification	3
Msex2.15509	Epsilon7	Glutathione S-transferase	Detoxification	3
Msex2.08395	Epsilon8	Glutathione S-transferase	Detoxification	3
Msex2.09785	MAPEG1	Glutathione S-transferase	Detoxification	3
Msex2.09786	MAPEG2	Glutathione S-transferase	Detoxification	3
Msex2.09787	MAPEG3	Glutathione S-transferase	Detoxification	3
Msex2.00305	MAPEGZ1	Glutathione S-transferase	Detoxification	3
Msex2.00306	MAPEGZ2	Glutathione S-transferase	Detoxification	3
Msex2.02376	Omega1	Glutathione S-transferase	Detoxification	3
Msex2.02375	Omega2	Glutathione S-transferase	Detoxification	3
Msex2.02374	Omega3	Glutathione S-transferase	Detoxification	3
Msex2.11063	Omega4	Glutathione S-transferase	Detoxification	3
Msex2.03348	Sigma1	Glutathione S-transferase	Detoxification	3
Msex2.03349	Sigma2	Glutathione S-transferase	Detoxification	3
Msex2.03350	Sigma3	Glutathione S-transferase	Detoxification	3
Msex2.15513	Sigma4a	Glutathione S-transferase	Detoxification	3
Msex2.03351	Sigma4b	Glutathione S-transferase	Detoxification	3
Msex2.15514	Sigma5a	Glutathione S-transferase	Detoxification	3
Msex2.03352	Sigma5b	Glutathione S-transferase	Detoxification	3
Msex2.03353	Sigma6	Glutathione S-transferase	Detoxification	3
Msex2.15515	Sigma8a	Glutathione S-transferase	Detoxification	3
Msex2.03355	Sigma8b	Glutathione S-transferase	Detoxification	3
Msex2.02313	Theta1	Glutathione S-transferase	Detoxification	3
Msex2.11763	Zeta1	Glutathione S-transferase	Detoxification	3
Msex2.11554	Zeta2	Glutathione S-transferase	Detoxification	3
Msex2.01219	Zeta3	Glutathione S-transferase	Detoxification	3
Msex2.12524	UGT33C	UDP-glucuronosyltransferase	Detoxification	3
Msex2.11079	UGT33E1	UDP-glucuronosyltransferase	Detoxification	3
Msex2.15498	UGT33E2	UDP-glucuronosyltransferase	Detoxification	3
Msex2.12523	UGT33E3	UDP-glucuronosyltransferase	Detoxification	3
Msex2.01742	UGT33G1	UDP-glucuronosyltransferase	Detoxification	3
Msex2.15495	UGT33G2	UDP-glucuronosyltransferase	Detoxification	3
Msex2.15496	UGT33G3	UDP-glucuronosyltransferase	Detoxification	3
Msex2.11078	UGT33H1	UDP-glucuronosyltransferase	Detoxification	3
Msex2.11077	UGT33H2	UDP-glucuronosyltransferase	Detoxification	3
Msex2.10200	UGT33L1	UDP-glucuronosyltransferase	Detoxification	3
Msex2.12525	UGT33P1	UDP-glucuronosyltransferase	Detoxification	3
Msex2.13845	UGT340A1	UDP-glucuronosyltransferase	Detoxification	3
Msex2.13847	UGT340A2	UDP-glucuronosyltransferase	Detoxification	3
Msex2.11081	UGT340A3	UDP-glucuronosyltransferase	Detoxification	3
Msex2.11082	UGT340A4	UDP-glucuronosyltransferase	Detoxification	3
Msex2.13848	UGT340A5p	UDP-glucuronosyltransferase	Detoxification	3
Msex2.11080	UGT340B1	UDP-glucuronosyltransferase	Detoxification	3
Msex2.05263	UGT34A4	UDP-glucuronosyltransferase	Detoxification	3
Msex2.01842	UGT39B3	UDP-glucuronosyltransferase	Detoxification	3
Msex2.02748	UGT40A2	UDP-glucuronosyltransferase	Detoxification	3
Msex2.12598	UGT40A2	UDP-glucuronosyltransferase	Detoxification	3
Msex2.09878	UGT40C1	UDP-glucuronosyltransferase	Detoxification	3
Msex2.15529	UGT40C2	UDP-glucuronosyltransferase	Detoxification	3
Msex2.09879	UGT40C3	UDP-glucuronosyltransferase	Detoxification	3
Msex2.09875	UGT40E1	UDP-glucuronosyltransferase	Detoxification	3
Msex2.15497	UGT40E2	UDP-glucuronosyltransferase	Detoxification	3
Msex2.09877	UGT40H2	UDP-glucuronosyltransferase	Detoxification	3
Msex2.09876	UGT40J1p	UDP-glucuronosyltransferase	Detoxification	3
Msex2.09880	UGT40L2	UDP-glucuronosyltransferase	Detoxification	3
Msex2.10777	UGT41C1	UDP-glucuronosyltransferase	Detoxification	3
Msex2.00532	UGT42A3	UDP-glucuronosyltransferase	Detoxification	3
Msex2.00534	UGT42A4	UDP-glucuronosyltransferase	Detoxification	3
Msex2.00533	UGT42B3	UDP-glucuronosyltransferase	Detoxification	3
Msex2.05185	UGT44A3	UDP-glucuronosyltransferase	Detoxification	3
Msex2.06759	UGT45A1	UDP-glucuronosyltransferase	Detoxification	3
Msex2.04831	UGT46A5	UDP-glucuronosyltransferase	Detoxification	3
Msex2.08124	UGT46C1	UDP-glucuronosyltransferase	Detoxification	3
Msex2.11004	UGT47A3	UDP-glucuronosyltransferase	Detoxification	3
Msex2.09140	UGT48B1	UDP-glucuronosyltransferase	Detoxification	3
Msex2.12063	UGT50A3	UDP-glucuronosyltransferase	Detoxification	3
Msex2.14488	UGT50A3	UDP-glucuronosyltransferase	Detoxification	3
Msex2.15377	UGT50A3	UDP-glucuronosyltransferase	Detoxification	3
Msex2.02747		UDP-glucuronosyltransferase	Detoxification	3
Msex2.13846		UDP-glucuronosyltransferase	Detoxification	3
Msex2.15545		UDP-glucuronosyltransferase	Detoxification	3
Msex2.01301	Lebocin-A	Antimicrobial peptid	Immune response	3
Msex2.01302	Lebocin-B	Antimicrobial peptid	Immune response	3
Msex2.01303	Lebocin-D	Antimicrobial peptid	Immune response	3
Msex2.01305	Lebocin-C	Antimicrobial peptid	Immune response	3
Msex2.02244	Defensin2	Antimicrobial peptid	Immune response	3
Msex2.04820	Lysozyme-2	Antimicrobial peptid	Immune response	3
Msex2.04821	Lysozyme-likeprotein	Antimicrobial peptid	Immune response	3
Msex2.04822	Lysozyme-1	Antimicrobial peptid	Immune response	3
Msex2.04906	WAP01	Antimicrobial peptid	Immune response	3
Msex2.04907	WAP02	Antimicrobial peptid	Immune response	3
Msex2.05149	WAP03	Antimicrobial peptid	Immune response	3
Msex2.05150	WAP04	Antimicrobial peptid	Immune response	3
Msex2.05151	WAP08	Antimicrobial peptid	Immune response	3
Msex2.05152	WAP05	Antimicrobial peptid	Immune response	3
Msex2.05153	WAP06	Antimicrobial peptid	Immune response	3
Msex2.05154	WAP07	Antimicrobial peptid	Immune response	3
Msex2.05155	WAP09	Antimicrobial peptid	Immune response	3
Msex2.05156	WAP10	Antimicrobial peptid	Immune response	3
Msex2.05157	WAP11	Antimicrobial peptid	Immune response	3
Msex2.05158	WAP12	Antimicrobial peptid	Immune response	3
Msex2.05159	WAP13	Antimicrobial peptid	Immune response	3
Msex2.05160	WAP14	Antimicrobial peptid	Immune response	3
Msex2.05161	WAP15	Antimicrobial peptid	Immune response	3
Msex2.05594	Moricin-likepeptide	Antimicrobial peptid	Immune response	3
Msex2.05595	Moricin1	Antimicrobial peptid	Immune response	3
Msex2.05596	Moricin2	Antimicrobial peptid	Immune response	3
Msex2.05597	Moricin-likepeptide	Antimicrobial peptid	Immune response	3
Msex2.05598	Moricin-likepeptide	Antimicrobial peptid	Immune response	3
Msex2.05599	Moricin-likepeptide	Antimicrobial peptid	Immune response	3
Msex2.06539	Defensin1	Antimicrobial peptid	Immune response	3
Msex2.08540	Attacin06	Antimicrobial peptid	Immune response	3
Msex2.08541	Attacin02	Antimicrobial peptid	Immune response	3
Msex2.08542	Attacin03	Antimicrobial peptid	Immune response	3
Msex2.08543	Attacin10	Antimicrobial peptid	Immune response	3
Msex2.08544	Attacin01	Antimicrobial peptid	Immune response	3
Msex2.08545	Attacin04	Antimicrobial peptid	Immune response	3
Msex2.08785	Cecropin07	Antimicrobial peptid	Immune response	3
Msex2.08787	Cecropin09	Antimicrobial peptid	Immune response	3
Msex2.08788	Cecropin10	Antimicrobial peptid	Immune response	3
Msex2.09992	Lysozyme-likeprotein	Antimicrobial peptid	Immune response	3
Msex2.09994	Lysozyme-3	Antimicrobial peptid	Immune response	3
Msex2.09998	Lysozyme-like	Antimicrobial peptid	Immune response	3
Msex2.11074	Gloverin	Antimicrobial peptid	Immune response	3
Msex2.12105	Gallerimycin 2	Antimicrobial peptid	Immune response	3
Msex2.12106	Gallerimycin 3	Antimicrobial peptid	Immune response	3
Msex2.12108	Gallerimycin 1	Antimicrobial peptid	Immune response	3
Msex2.13057	AFP13	Antimicrobial peptid	Immune response	3
Msex2.13789	Cecropin01	Antimicrobial peptid	Immune response	3
Msex2.13830	AFP03	Antimicrobial peptid	Immune response	3
Msex2.13831	AFP02	Antimicrobial peptid	Immune response	3
Msex2.13832	AFP04	Antimicrobial peptid	Immune response	3
Msex2.13833	AFP05	Antimicrobial peptid	Immune response	3
Msex2.13834	AFP06	Antimicrobial peptid	Immune response	3
Msex2.13835	AFP07	Antimicrobial peptid	Immune response	3
Msex2.13836	AFP08	Antimicrobial peptid	Immune response	3
Msex2.13837	AFP09	Antimicrobial peptid	Immune response	3
Msex2.13839	AFP11	Antimicrobial peptid	Immune response	3
Msex2.13907	Cecropin02	Antimicrobial peptid	Immune response	3
Msex2.13910	Cecropin05	Antimicrobial peptid	Immune response	3
Msex2.13912	Cecropin06	Antimicrobial peptid	Immune response	3
Msex2.13920	Attacin05	Antimicrobial peptid	Immune response	3
Msex2.13921	Attacin09	Antimicrobial peptid	Immune response	3
Msex2.14460	Cecropin13	Antimicrobial peptid	Immune response	3
Msex2.14461	Cecropin14	Antimicrobial peptid	Immune response	3
Msex2.14466	Cecropin12	Antimicrobial peptid	Immune response	3
Msex2.14467	Cecropin11	Antimicrobial peptid	Immune response	3
Msex2.14877	AFP14	Antimicrobial peptid	Immune response	3
Msex2.15011	AFP01	Antimicrobial peptid	Immune response	3
Msex2.15057	AFP12	Antimicrobial peptid	Immune response	3
Msex2.15307	AFP10	Antimicrobial peptid	Immune response	3
Msex2.15523	Cecropin08	Antimicrobial peptid	Immune response	3
Msex2.15547	Cecropin03	Antimicrobial peptid	Immune response	3
Msex2.15548	Cecropin04	Antimicrobial peptid	Immune response	3
Msex2.03959	Ark	Apoptosis	Immune response	4
Msex2.05494	caspase-1	Apoptosis	Immune response	4
Msex2.09469	caspase-4-1	Apoptosis	Immune response	4
Msex2.09470	caspase-4-2	Apoptosis	Immune response	4
Msex2.12395	Dronc	Apoptosis	Immune response	4
Msex2.12419	caspase-3	Apoptosis	Immune response	4
Msex2.13122	Deterin/IAP3	Apoptosis	Immune response	4
Msex2.01715	reaper/ IBM1_IAP_Antagonist	Apoptosis/Immune deficiency pathway	Immune response	4,3
Msex2.05607	IAP1	Apoptosis/Immune deficiency pathway	Immune response	4
Msex2.00263	Atg3	Autophagy	Immune response	4
Msex2.00593	Atg16	Autophagy	Immune response	4
Msex2.00700	Atg7	Autophagy	Immune response	4
Msex2.04200	PI3K	Autophagy	Immune response	4
Msex2.04898	Vps15/IRD1	Autophagy	Immune response	4
Msex2.06015	Atg9	Autophagy	Immune response	4
Msex2.06034	TOR	Autophagy	Immune response	4
Msex2.06273	Atg13	Autophagy	Immune response	4
Msex2.06465	Vps34/IP3 kinase 59F	Autophagy	Immune response	4
Msex2.06647	Atg1	Autophagy	Immune response	4
Msex2.07350	Atg13like	Autophagy	Immune response	4
Msex2.07476	Akt	Autophagy	Immune response	4
Msex2.07946	Atg14	Autophagy	Immune response	4
Msex2.08091	Atg2	Autophagy	Immune response	4
Msex2.08123	Atg10	Autophagy	Immune response	4
Msex2.11988	Atg18	Autophagy	Immune response	4
Msex2.12034	Atg4	Autophagy	Immune response	4
Msex2.12227	Atg8	Autophagy	Immune response	4
Msex2.12458	Atg5	Autophagy	Immune response	4
Msex2.13124	Atg12	Autophagy	Immune response	4
Msex2.13198	Atg6	Autophagy	Immune response	4
Msex2.14237	FIP200/Atg17	Autophagy	Immune response	4
Msex2.02637	Transferrin 1	Binding and removal of free ions	Immune response	3
Msex2.10790	Transferrin2,partial	Binding and removal of free ions	Immune response	3
Msex2.10792	Transferrin2	Binding and removal of free ions	Immune response	3
Msex2.10793	Transferrin2,partial	Binding and removal of free ions	Immune response	3
Msex2.12754	Transferrin3	Binding and removal of free ions	Immune response	3
Msex2.00725	Dsor1	C-Jun N-terminal kinase-mitogen-activated protein kinase pathway	Immune response	4
Msex2.01035	Rpd3/HDAC1	C-Jun N-terminal kinase-mitogen-activated protein kinase pathway	Immune response	4
Msex2.01399	Hemolin-LP2	C-Jun N-terminal kinase-mitogen-activated protein kinase pathway	Immune response	3
Msex2.01572	Smrter	C-Jun N-terminal kinase-mitogen-activated protein kinase pathway	Immune response	4
Msex2.02452	MASK	C-Jun N-terminal kinase-mitogen-activated protein kinase pathway	Immune response	4
Msex2.02705	MKK4/Hem	C-Jun N-terminal kinase-mitogen-activated protein kinase pathway	Immune response	4,3
Msex2.02727	ECSIT	C-Jun N-terminal kinase-mitogen-activated protein kinase pathway	Immune response	4
Msex2.03747	Eiger	C-Jun N-terminal kinase-mitogen-activated protein kinase pathway	Immune response	4
Msex2.04169	TRAF3	C-Jun N-terminal kinase-mitogen-activated protein kinase pathway	Immune response	4
Msex2.04292	Rolled/ERK	C-Jun N-terminal kinase-mitogen-activated protein kinase pathway	Immune response	4,3
Msex2.04304	MAPK	C-Jun N-terminal kinase-mitogen-activated protein kinase pathway	Immune response	3
Msex2.04553	Aop	C-Jun N-terminal kinase-mitogen-activated protein kinase pathway	Immune response	4
Msex2.04575	Pvr	C-Jun N-terminal kinase-mitogen-activated protein kinase pathway	Immune response	4
Msex2.04668	Cdc42	C-Jun N-terminal kinase-mitogen-activated protein kinase pathway	Immune response	4
Msex2.05111	Basket/Jun-/JNK	C-Jun N-terminal kinase-mitogen-activated protein kinase pathway	Immune response	4,3
Msex2.05275	Pointed	C-Jun N-terminal kinase-mitogen-activated protein kinase pathway	Immune response	4
Msex2.05629	Wengen	C-Jun N-terminal kinase-mitogen-activated protein kinase pathway	Immune response	4
Msex2.05770	Spitz	C-Jun N-terminal kinase-mitogen-activated protein kinase pathway	Immune response	4
Msex2.06159	PVF1	C-Jun N-terminal kinase-mitogen-activated protein kinase pathway	Immune response	4
Msex2.06206	Ebi	C-Jun N-terminal kinase-mitogen-activated protein kinase pathway	Immune response	4
Msex2.06400	PVF2	C-Jun N-terminal kinase-mitogen-activated protein kinase pathway	Immune response	4
Msex2.06450	Ras85D	C-Jun N-terminal kinase-mitogen-activated protein kinase pathway	Immune response	4
Msex2.06876	Misshapen-A/B/C	C-Jun N-terminal kinase-mitogen-activated protein kinase pathway	Immune response	4
Msex2.07041	GTPase-activating protein	C-Jun N-terminal kinase-mitogen-activated protein kinase pathway	Immune response	3
Msex2.07169	MLK1	C-Jun N-terminal kinase-mitogen-activated protein kinase pathway	Immune response	4
Msex2.07245	Rac1	C-Jun N-terminal kinase-mitogen-activated protein kinase pathway	Immune response	4
Msex2.07813	Licorne/MKK3	C-Jun N-terminal kinase-mitogen-activated protein kinase pathway	Immune response	4
Msex2.08319	MAPK2	C-Jun N-terminal kinase-mitogen-activated protein kinase pathway	Immune response	3
Msex2.08712	Polehole/MAPKKK	C-Jun N-terminal kinase-mitogen-activated protein kinase pathway	Immune response	4,3
Msex2.09018	Hemolin-LP1	C-Jun N-terminal kinase-mitogen-activated protein kinase pathway	Immune response	3
Msex2.09332	Hem	C-Jun N-terminal kinase-mitogen-activated protein kinase pathway	Immune response	3
Msex2.09629	p38-A/B/MAPK	C-Jun N-terminal kinase-mitogen-activated protein kinase pathway	Immune response	4,3
Msex2.09807	Hemolin	C-Jun N-terminal kinase-mitogen-activated protein kinase pathway	Immune response	3
Msex2.09858	Fos	C-Jun N-terminal kinase-mitogen-activated protein kinase pathway	Immune response	4
Msex2.10253	MEKK1	C-Jun N-terminal kinase-mitogen-activated protein kinase pathway	Immune response	4
Msex2.11950	Vein	C-Jun N-terminal kinase-mitogen-activated protein kinase pathway	Immune response	4
Msex2.12422	Jra	C-Jun N-terminal kinase-mitogen-activated protein kinase pathway	Immune response	4
Msex2.13030	Alk	C-Jun N-terminal kinase-mitogen-activated protein kinase pathway	Immune response	4
Msex2.14907	TRAF1	C-Jun N-terminal kinase-mitogen-activated protein kinase pathway	Immune response	4
Msex2.15051	Hep/MKK7	C-Jun N-terminal kinase-mitogen-activated protein kinase pathway	Immune response	4
Msex2.09885	PPO	Effector gene	Immune response	3
Msex2.11367	PPO	Effector gene	Immune response	3
Msex2.01596	IAP1 similar	Immune deficiency pathway	Immune response	3
Msex2.02401	USP36	Immune deficiency pathway	Immune response	4
Msex2.02405	Uev1A	Immune deficiency pathway	Immune response	4
Msex2.02537	Cullin	Immune deficiency pathway	Immune response	4
Msex2.02602	TAK1	Immune deficiency pathway	Immune response	3
Msex2.02974	Effete	Immune deficiency pathway	Immune response	4
Msex2.03129	FADD	Immune deficiency pathway	Immune response	4
Msex2.03324	Sickie	Immune deficiency pathway	Immune response	4
Msex2.04297	Dredd/caspase	Immune deficiency pathway	Immune response	4
Msex2.05021	NEMO	Immune deficiency pathway	Immune response	4
Msex2.05476	DeathDomainProtein	Immune deficiency pathway	Immune response	3
Msex2.05477	IMD	Immune deficiency pathway	Immune response	4
Msex2.05545	Tab2/TAB	Immune deficiency pathway	Immune response	4,3
Msex2.05604	IAP2	Immune deficiency pathway	Immune response	4
Msex2.06796	SkpA	Immune deficiency pathway	Immune response	4
Msex2.06959	DNR1	Immune deficiency pathway	Immune response	4
Msex2.07681	Ubc13/bendless	Immune deficiency pathway	Immune response	4
Msex2.07978	Dsp	Immune deficiency pathway	Immune response	4
Msex2.08004	Relish	Immune deficiency pathway	Immune response	4
Msex2.08285	POSH1	Immune deficiency pathway	Immune response	4
Msex2.08381	POSH2	Immune deficiency pathway	Immune response	4
Msex2.08496	PIRK	Immune deficiency pathway	Immune response	4
Msex2.08499	Caspar	Immune deficiency pathway	Immune response	4
Msex2.09266	CYLD	Immune deficiency pathway	Immune response	4
Msex2.10401	Ntf2	Immune deficiency pathway	Immune response	4
Msex2.11414	IKKbeta/IRD5	Immune deficiency pathway	Immune response	4
Msex2.12479	Akirin	Immune deficiency pathway	Immune response	4
Msex2.12517	IKKgamma/Kenny	Immune deficiency pathway	Immune response	4
Msex2.15435	SlimB	Immune deficiency pathway	Immune response	4
Msex2.11527	PGRP-Lca/b/PGRP-12	Immune deficiency pathway/Microbial Recognition	Immune response	4,3
Msex2.12103	5-TOX	Immune gene	Immune response	3
Msex2.12453	PORC	Immune Gene	Immune response	3
Msex2.04570	Caudal/HoxDP1	Januskinase-Signal Transducers and Activators of Transcription pathway	Immune response	4
Msex2.07815	Domeless	Januskinase-Signal Transducers and Activators of Transcription pathway	Immune response	4
Msex2.07842	ZHF1	Januskinase-Signal Transducers and Activators of Transcription pathway	Immune response	4
Msex2.08880	JAK/Hopscotch	Januskinase-Signal Transducers and Activators of Transcription pathway	Immune response	4
Msex2.09515	Stam	Januskinase-Signal Transducers and Activators of Transcription pathway	Immune response	4
Msex2.09964	PIAS	Januskinase-Signal Transducers and Activators of Transcription pathway	Immune response	4
Msex2.10552	STAT	Januskinase-Signal Transducers and Activators of Transcription pathway	Immune response	4
Msex2.11519	SOCS	Januskinase-Signal Transducers and Activators of Transcription pathway	Immune response	4
Msex2.12153	STAT	Januskinase-Signal Transducers and Activators of Transcription pathway	Immune response	3
Msex2.03605	PGRP-03	Microbial Recognition	Immune response	3
Msex2.03606	PGRP-04	Microbial Recognition	Immune response	3
Msex2.03607	PGRP-02	Microbial Recognition	Immune response	3
Msex2.06179	MBP	Microbial Recognition	Immune response	3
Msex2.07575	Nimrod	Microbial Recognition	Immune response	3
Msex2.07576	Nimrod-B	Microbial Recognition	Immune response	3
Msex2.07580	Nimrod-like	Microbial Recognition	Immune response	3
Msex2.09015	PGRP-08	Microbial Recognition	Immune response	3
Msex2.09398	PGRP-11	Microbial Recognition	Immune response	3
Msex2.10091	PGRP-09	Microbial Recognition	Immune response	3
Msex2.10092	PGRP-01	Microbial Recognition	Immune response	3
Msex2.10093	PGRP-13	Microbial Recognition	Immune response	3
Msex2.10096	PGRP-06	Microbial Recognition	Immune response	3
Msex2.10097	PGRP-07	Microbial Recognition	Immune response	3
Msex2.11767	PGRP-11	Microbial Recognition	Immune response	3
Msex2.12427	TEP1	Microbial Recognition	Immune response	3
Msex2.13097	TEP2	Microbial Recognition	Immune response	3
Msex2.13760	BGRP1	Microbial Recognition	Immune response	3
Msex2.13829	BGRP3	Microbial Recognition	Immune response	3
Msex2.14130	BGRP2	Microbial Recognition	Immune response	3
Msex2.14131	BGRP	Microbial Recognition	Immune response	3
Msex2.15530	PGRP-05	Microbial Recognition	Immune response	3
Msex2.10120	PAP3	Prophenoloxidase activating protease	Immune response	5
Msex2.00134	R3D1/Loqs	RNAi pathway	Immune response	4
Msex2.00504	Drosha	RNAi pathway	Immune response	4
Msex2.00515	Tis11	RNAi pathway	Immune response	4
Msex2.00687	Nibbler	RNAi pathway	Immune response	4
Msex2.00855	CBC	RNAi pathway	Immune response	4
Msex2.02567	Yb	RNAi pathway	Immune response	4
Msex2.03845	Translin	RNAi pathway	Immune response	4
Msex2.04346	Pasha	RNAi pathway	Immune response	4
Msex2.04435	Ago3	RNAi pathway	Immune response	4
Msex2.04462	Dicer2	RNAi pathway	Immune response	4
Msex2.05051	Vig	RNAi pathway	Immune response	4
Msex2.05384	Gawky	RNAi pathway	Immune response	4
Msex2.05484	Armitage	RNAi pathway	Immune response	4
Msex2.05578	Ago2	RNAi pathway	Immune response	4
Msex2.05992	TSN	RNAi pathway	Immune response	4
Msex2.06819	Qin	RNAi pathway	Immune response	4
Msex2.06888	Ge-1/EDC4	RNAi pathway	Immune response	4
Msex2.06997	Ago1	RNAi pathway	Immune response	4
Msex2.07801	HPS4	RNAi pathway	Immune response	4
Msex2.07859	piwi	RNAi pathway	Immune response	4
Msex2.08637	Blanks	RNAi pathway	Immune response	4
Msex2.09771	Belle/Cap	RNAi pathway	Immune response	4
Msex2.10619	Expotin5	RNAi pathway	Immune response	4
Msex2.10734	Dicer1	RNAi pathway	Immune response	4
Msex2.11975	Me31B	RNAi pathway	Immune response	4
Msex2.13345	Shu	RNAi pathway	Immune response	4
Msex2.15357	Zuc	RNAi pathway	Immune response	4
Msex2.00225	Ars2/Ulp1	RNAi pathway/Toll pathway	Immune response	4
Msex2.00634	SP58	Serine protease	Immune response	5
Msex2.02447	SP129	Serine protease	Immune response	5
Msex2.02448	SP130	Serine protease	Immune response	5
Msex2.02535	SP131	Serine protease	Immune response	5
Msex2.02634	SP132	Serine protease	Immune response	5
Msex2.02853	SP134	Serine protease	Immune response	5
Msex2.03588	SP138	Serine protease	Immune response	5
Msex2.03861	SP140	Serine protease	Immune response	5
Msex2.03862	SP141	Serine protease	Immune response	5
Msex2.03866	SP142	Serine protease	Immune response	5
Msex2.03877	SP143	Serine protease	Immune response	5
Msex2.03966	SP35	Serine protease	Immune response	5
Msex2.03967	SP36	Serine protease	Immune response	5
Msex2.03969	SP37	Serine protease	Immune response	5
Msex2.03970	SP38	Serine protease	Immune response	5
Msex2.03998	SP39	Serine protease	Immune response	5
Msex2.03999	SP40	Serine protease	Immune response	5
Msex2.04232	SP41	Serine protease	Immune response	5
Msex2.04328	SP43	Serine protease	Immune response	5
Msex2.04716	SP44	Serine protease	Immune response	5
Msex2.05076	SP45	Serine protease	Immune response	5
Msex2.05195	SP46	Serine protease	Immune response	5
Msex2.05530	SP48	Serine protease	Immune response	5
Msex2.05679	SP51	Serine protease	Immune response	5
Msex2.05729	SP50	Serine protease	Immune response	5
Msex2.05878	SP52	Serine protease	Immune response	5
Msex2.06289	SP54	Serine protease	Immune response	5
Msex2.06354	SP55	Serine protease	Immune response	5
Msex2.06933	SP57	Serine protease	Immune response	5
Msex2.06986	SP56	Serine protease	Immune response	5
Msex2.08320	SP59	Serine protease	Immune response	5
Msex2.09346	SP61	Serine protease	Immune response	5
Msex2.09420	SP60	Serine protease	Immune response	5
Msex2.09642	SP47	Serine protease	Immune response	5
Msex2.09643	SP62	Serine protease	Immune response	5
Msex2.09647	SP66	Serine protease	Immune response	5
Msex2.09648	SP63	Serine protease	Immune response	5
Msex2.09726	SP70	Serine protease	Immune response	5
Msex2.10277	SP69	Serine protease	Immune response	5
Msex2.10456	SP144	Serine protease	Immune response	5
Msex2.10725	SP72	Serine protease	Immune response	5
Msex2.10807	SP73	Serine protease	Immune response	5
Msex2.10829	SP74	Serine protease	Immune response	5
Msex2.10830	SP75	Serine protease	Immune response	5
Msex2.10831	SP76	Serine protease	Immune response	5
Msex2.10832	SP77	Serine protease	Immune response	5
Msex2.10833	SP34	Serine protease	Immune response	5
Msex2.11656	SP81	Serine protease	Immune response	5
Msex2.11797	SP84	Serine protease	Immune response	5
Msex2.11857	SP82	Serine protease	Immune response	5
Msex2.12378	SP91	Serine protease	Immune response	5
Msex2.12488	SP86	Serine protease	Immune response	5
Msex2.12489	SP87	Serine protease	Immune response	5
Msex2.12491	SP88	Serine protease	Immune response	5
Msex2.12492	SP89	Serine protease	Immune response	5
Msex2.12493	SP90	Serine protease	Immune response	5
Msex2.12745	SP30	Serine protease	Immune response	5
Msex2.13602	SP94	Serine protease	Immune response	5
Msex2.14014	HP18a/SP33	Serine protease	Immune response	5
Msex2.14030	SP100	Serine protease	Immune response	5
Msex2.14072	SP97	Serine protease	Immune response	5
Msex2.14073	SP32	Serine protease	Immune response	5
Msex2.14074	SP31	Serine protease	Immune response	5
Msex2.14103	SP102	Serine protease	Immune response	5
Msex2.14362	SP111	Serine protease	Immune response	5
Msex2.14592	SP112	Serine protease	Immune response	5
Msex2.08494	GPH35/46	Serine protease (gut)	Immune response	5
Msex2.13601	GP6	Serine protease (gut)	Immune response	5
Msex2.14453	GP33	Serine protease (gut)	Immune response	5
Msex2.00155	HP6	Serine protease (hemolymph)	Immune response	5
Msex2.02224	HP4	Serine protease (hemolymph)	Immune response	5
Msex2.03587	HP19	Serine protease (hemolymph)	Immune response	5
Msex2.03769	HP1a	Serine protease (hemolymph)	Immune response	5
Msex2.03771	HP1b	Serine protease (hemolymph)	Immune response	5
Msex2.05105	HP3	Serine protease (hemolymph)	Immune response	5
Msex2.05571	PAP1	Serine protease (hemolymph)	Immune response	5
Msex2.05889	HP17a	Serine protease (hemolymph)	Immune response	5
Msex2.05890	HP17b	Serine protease (hemolymph)	Immune response	5
Msex2.05916	HP27	Serine protease (hemolymph)	Immune response	5
Msex2.08610	HP11	Serine protease (hemolymph)	Immune response	5
Msex2.10122	HP24	Serine protease (hemolymph)	Immune response	5
Msex2.10123	HP12	Serine protease (hemolymph)	Immune response	5
Msex2.10803	HP29	Serine protease (hemolymph)	Immune response	5
Msex2.10834	HP14b	Serine protease (hemolymph)	Immune response	5
Msex2.10835	HP25	Serine protease (hemolymph)	Immune response	5
Msex2.10838	HP20	Serine protease (hemolymph)	Immune response	5
Msex2.11067	HP13	Serine protease (hemolymph)	Immune response	5
Msex2.11070	HP2	Serine protease (hemolymph)	Immune response	5
Msex2.11072	HP16b	Serine protease (hemolymph)	Immune response	5
Msex2.11522	HP18b	Serine protease (hemolymph)	Immune response	5
Msex2.11657	HP9	Serine protease (hemolymph)	Immune response	5
Msex2.12514	HP16a	Serine protease (hemolymph)	Immune response	5
Msex2.12724	HP15	Serine protease (hemolymph)	Immune response	5
Msex2.12750	HP14a	Serine protease (hemolymph)	Immune response	5
Msex2.13456	HP10	Serine protease (hemolymph)	Immune response	5
Msex2.13599	HP8	Serine protease (hemolymph)	Immune response	5
Msex2.13600	HP5	Serine protease (hemolymph)	Immune response	5
Msex2.14451	HP26	Serine protease (hemolymph)	Immune response	5
Msex2.14468	HP23	Serine protease (hemolymph)	Immune response	5
Msex2.15535	HP21	Serine protease (hemolymph)	Immune response	5
Msex2.00453	SPH42	Serine protease homolog	Immune response	5
Msex2.00813	scolexinB	Serine protease homolog	Immune response	5
Msex2.00814	scolexinA	Serine protease homolog	Immune response	5
Msex2.01061	SPH92	Serine protease homolog	Immune response	5
Msex2.03764	SPH139	Serine protease homolog	Immune response	5
Msex2.04985	SPH145	Serine protease homolog	Immune response	5
Msex2.05893	SPH53	Serine protease homolog	Immune response	5
Msex2.09816	SPH1b	Serine protease homolog	Immune response	5
Msex2.10840	SPH3/33	Serine protease homolog	Immune response	5
Msex2.11243	SPH79/96	Serine protease homolog	Immune response	5
Msex2.11800	SPH2	Serine protease homolog	Immune response	5
Msex2.14187	SPH101	Serine protease homolog	Immune response	5
Msex2.14206	SPH103/104	Serine protease homolog	Immune response	5
Msex2.01982	Serpent	Toll pathway	Immune response	4
Msex2.01983	GATAe	Toll pathway	Immune response	4
Msex2.01984	Pannier-1/2	Toll pathway	Immune response	4
Msex2.02793	cactus	Toll pathway	Immune response	4
Msex2.02902	Spz7	Toll pathway	Immune response	4
Msex2.02908	Spz2	Toll pathway	Immune response	4
Msex2.02909	Spz1	Toll pathway	Immune response	4
Msex2.03003	GATAd	Toll pathway	Immune response	4
Msex2.03266	Smt3	Toll pathway	Immune response	4
Msex2.03391	Spz4	Toll pathway	Immune response	3
Msex2.03392	Toll9_1	Toll pathway	Immune response	4
Msex2.03458	aPKC-A/B	Toll pathway	Immune response	4
Msex2.03733	Kurtz	Toll pathway	Immune response	4
Msex2.03914	Ref2P-A/b/C	Toll pathway	Immune response	4
Msex2.03950	Toll7_1	Toll pathway	Immune response	4
Msex2.03960	Toll10_3	Toll pathway	Immune response	4
Msex2.03961	Toll10_2	Toll pathway	Immune response	4
Msex2.03963	Toll10_1	Toll pathway	Immune response	4
Msex2.03965	Toll6	Toll pathway	Immune response	4
Msex2.04007	Toll-like	Toll pathway	Immune response	3
Msex2.04433	Spz3	Toll pathway	Immune response	3
Msex2.05298	ML5	Toll pathway	Immune response	4
Msex2.05827	Toll12	Toll pathway	Immune response	4
Msex2.06752	Toll8	Toll pathway	Immune response	4
Msex2.07072	U-shaped	Toll pathway	Immune response	4
Msex2.07309	TAMP	Toll pathway	Immune response	4
Msex2.07379	Toll7-3/Spz6	Toll pathway	Immune response	4,3
Msex2.07405	Toll7_2	Toll pathway	Immune response	4
Msex2.07505	Spz6	Toll pathway	Immune response	4
Msex2.07671	Toll9_2	Toll pathway	Immune response	4
Msex2.08060	GPRK2	Toll pathway	Immune response	4
Msex2.08358	ML2	Toll pathway	Immune response	4
Msex2.08468	ML1	Toll pathway	Immune response	4
Msex2.08510	Aos1	Toll pathway	Immune response	4
Msex2.08663	Tube	Toll pathway	Immune response	4
Msex2.08812	Tollip-1	Toll pathway	Immune response	4
Msex2.08997	Lesswright	Toll pathway	Immune response	4
Msex2.09057	Toll4	Toll pathway	Immune response	4
Msex2.09861	Pellino	Toll pathway	Immune response	4
Msex2.09986	Spz2	Toll pathway	Immune response	3
Msex2.10170	ML3	Toll pathway	Immune response	4
Msex2.10263	Grain	Toll pathway	Immune response	4
Msex2.10593	Uba2	Toll pathway	Immune response	4
Msex2.11231	TRAF2	Toll pathway	Immune response	4
Msex2.11498	Dif-A/B	Toll pathway	Immune response	4
Msex2.11500	Dorsal-A/B/C	Toll pathway	Immune response	4
Msex2.11537	Tollip-2/TollInteractingProtein	Toll pathway	Immune response	4,3
Msex2.12079	MyD88	Toll pathway	Immune response	4
Msex2.12149	Toll5	Toll pathway	Immune response	4
Msex2.12529	Spz5	Toll pathway	Immune response	3
Msex2.12985	Cactin	Toll pathway	Immune response	4
Msex2.13883	Toll-like	Toll pathway	Immune response	3
Msex2.14106	Pelle	Toll pathway	Immune response	4
Msex2.14776	Deaf1	Toll pathway	Immune response	4
Msex2.15321	Toll2	Toll pathway	Immune response	4
Msex2.00152	Dnmt1	DNA methyltransferase 1	Epigenetic modification	3
Msex2.03487	Dnmt2	DNA methyltransferase 2	Epigenetic modification	3
Msex2.08349	DMAP1	DNA methyltransferase1 binding protein 1	Epigenetic modification	3
Msex2.02501	MDB	Methyl-CpG-binding domain protein	Epigenetic modification	3
Msex2.04809	HAT	Histone acetyltransferase	Epigenetic modification	3
Msex2.12314	HAT	Histone acetyltransferase	Epigenetic modification	3
Msex2.15049	HAT	Histone acetyltransferase	Epigenetic modification	3
Msex2.14428	HAT	Histone acetyltransferase	Epigenetic modification	3
Msex2.14711	HAT	Histone acetyltransferase	Epigenetic modification	3
Msex2.15320	HAT	Histone acetyltransferase	Epigenetic modification	3
Msex2.00057	HAT	Histone acetyltransferase	Epigenetic modification	3
Msex2.05200	HAT	Histone acetyltransferase	Epigenetic modification	3
Msex2.10571	HDAC	Histone deacetylase	Epigenetic modification	3
Msex2.07499	HDAC	Histone deacetylase	Epigenetic modification	3
Msex2.10105	HDAC	Histone deacetylase	Epigenetic modification	3
Msex2.08625	HDAC	Histone deacetylase	Epigenetic modification	3
Msex2.00922	HDAC	Histone deacetylase	Epigenetic modification	3
Msex2.03629	HDAC	Histone deacetylase	Epigenetic modification	3
Msex2.01035	HDAC	Histone deacetylase	Epigenetic modification	3
Msex2.05311	HDAC	Histone deacetylase complex subunit	Epigenetic modification	3
Msex2.06737	HDAC	Histone deacetylase complex subunit	Epigenetic modification	3
Msex2.07977	HDAC	Histone deacetylase complex subunit	Epigenetic modification	3
Msex2.04669	HDAC	Histone acetyltransferase	Epigenetic modification	3
Msex2.01320	EcR-A	Ecdysone receptor	Juvenile hormone and ecdoysone regulated pathways	6
Msex2.01317	EcR-B1	Ecdysone receptor	Juvenile hormone and ecdoysone regulated pathways	7
Msex2.12610	USP-1	Ecdysone receptor	Juvenile hormone and ecdoysone regulated pathways	8
Msex2.12611	USP-2	Ecdysone receptor	Juvenile hormone and ecdoysone regulated pathways	8
Msex2.03873	MHR3	20-Hydroxyecdysone receptor	Juvenile hormone and ecdoysone regulated pathways	9
Msex2.06125	MHR4	20-Hydroxyecdysone receptor	Juvenile hormone and ecdoysone regulated pathways	10
Msex2.04789	betaFTZ-F1	Ecdysteroid-induced trancription factor	Juvenile hormone and ecdoysone regulated pathways	10
Msex2.08231	BRC-Z3	20-Hydroxyecdysone-induced transcription factor	Juvenile hormone and ecdoysone regulated pathways	11
Msex2.10083	DDC	Dopa decaboxylase	Juvenile hormone and ecdoysone regulated pathways	12
Msex2.01257	E75A	Juvenile hormone/ ecdysone-induced transcription factor	Juvenile hormone and ecdoysone regulated pathways	13
Msex2.01258	E75B	Juvenile hormone/ ecdysone-induced transcription factor	Juvenile hormone and ecdoysone regulated pathways	14
Msex2.01258	E75D	Juvenile hormone/ ecdysone-induced transcription factor	Juvenile hormone and ecdoysone regulated pathways	15
Msex2.08702	E74A	Juvenile hormone/ ecdysone-induced transcription factor	Juvenile hormone and ecdoysone regulated pathways	16
Msex2.08701	E74B	Juvenile hormone/ ecdysone-induced transcription factor	Juvenile hormone and ecdoysone regulated pathways	16
Msex2.02174	Chorion class A protein 1	Chorion protein		3
Msex2.02176	Chorion class A protein 2	Chorion protein		3
Msex2.02179	Chorion class A protein 4	Chorion protein		3
Msex2.02180	Chorion class A protein 5	Chorion protein		3
Msex2.02182	Chorion class A protein 6	Chorion protein		3
Msex2.02184	Chorion class A protein 7	Chorion protein		3
Msex2.02186	Chorion class A protein 8	Chorion protein		3
Msex2.02188	Chorion class A protein 9	Chorion protein		3
Msex2.02190	Chorion class A protein 10	Chorion protein		3
Msex2.02192	Chorion class A protein 11	Chorion protein		3
Msex2.02195	Chorion class A protein 12	Chorion protein		3
Msex2.02197	Chorion class A protein 13	Chorion protein		3
Msex2.02198	Chorion class A protein 14	Chorion protein		3
Msex2.02200	Chorion class A protein 15	Chorion protein		3
Msex2.02202	Chorion class A protein 16	Chorion protein		3
Msex2.02205	Chorion class A protein 17	Chorion protein		3
Msex2.02207	Chorion class A protein 18	Chorion protein		3
Msex2.02210	Chorion class A protein 20	Chorion protein		3
Msex2.02212	Chorion class A protein 21	Chorion protein		3
Msex2.14900	Chorion class A protein 22	Chorion protein		3
Msex2.03790	Chorion class A protein 22	Chorion protein		3
Msex2.03792	Chorion class A protein 23	Chorion protein		3
Msex2.03797	Chorion class A protein 25	Chorion protein		3
Msex2.03799	Chorion class A protein 26	Chorion protein		3
Msex2.03801	Chorion class A protein 27	Chorion protein		3
Msex2.03803	Chorion class A protein 28 and 29	Chorion protein		3
Msex2.03806	Chorion class A protein 30	Chorion protein		3
Msex2.03808	Chorion class A protein 32	Chorion protein		3
Msex2.03812	Chorion class A protein 35	Chorion protein		3
Msex2.03814	Chorion class A protein 36	Chorion protein		3
Msex2.03819	Chorion class A protein 39	Chorion protein		3
Msex2.03820	Chorion class A protein 40	Chorion protein		3
Msex2.03823	Chorion class A protein 41	Chorion protein		3
Msex2.03825	Chorion class A protein 42	Chorion protein		3
Msex2.02175	Chorion class B protein 2	Chorion protein		3
Msex2.02177	Chorion class B protein 3	Chorion protein		3
Msex2.02178	Chorion class B protein 4	Chorion protein		3
Msex2.02181	Chorion class B protein 5	Chorion protein		3
Msex2.02183	Chorion class B protein 6	Chorion protein		3
Msex2.02185	Chorion class B protein 7	Chorion protein		3
Msex2.02187	Chorion class B protein 8	Chorion protein		3
Msex2.02189	Chorion class B protein 9	Chorion protein		3
Msex2.02191	Chorion class B protein 10	Chorion protein		3
Msex2.02193	Chorion class B protein 11	Chorion protein		3
Msex2.02194	Chorion class B protein 12	Chorion protein		3
Msex2.02196	Chorion class B protein 13	Chorion protein		3
Msex2.02199	Chorion class B protein 14	Chorion protein		3
Msex2.02201	Chorion class B protein 15	Chorion protein		3
Msex2.02203	Chorion class B protein 16	Chorion protein		3
Msex2.02204	Chorion class B protein 17	Chorion protein		3
Msex2.02206	Chorion class B protein 18	Chorion protein		3
Msex2.02208	Chorion class B protein 19	Chorion protein		3
Msex2.02209	Chorion class B protein 20	Chorion protein		3
Msex2.02211	Chorion class B protein 21	Chorion protein		3
Msex2.03791	Chorion class B protein 22	Chorion protein		3
Msex2.03794	Chorion class B protein 23	Chorion protein		3
Msex2.03795	Chorion class B protein 24	Chorion protein		3
Msex2.03796	Chorion class B protein 25	Chorion protein		3
Msex2.03798	Chorion class B protein 26	Chorion protein		3
Msex2.03800	Chorion class B protein 27	Chorion protein		3
Msex2.03802	Chorion class B protein 28	Chorion protein		3
Msex2.03804	Chorion class B protein 29	Chorion protein		3
Msex2.03805	Chorion class B protein 30	Chorion protein		3
Msex2.03807	Chorion class B protein 31	Chorion protein		3
Msex2.03809	Chorion class B protein 32	Chorion protein		3
Msex2.03810	Chorion class B protein 33	Chorion protein		3
Msex2.03811	Chorion class B protein 34	Chorion protein		3
Msex2.03813	Chorion class B protein 35	Chorion protein		3
Msex2.03815	Chorion class B protein 36	Chorion protein		3
Msex2.03816	Chorion class B protein 37	Chorion protein		3
Msex2.03817	Chorion class B protein 38	Chorion protein		3
Msex2.03818	Chorion class B protein 39	Chorion protein		3
Msex2.03821	Chorion class B protein 40	Chorion protein		3
Msex2.03822	Chorion class B protein 41	Chorion protein		3
Msex2.03824	Chorion class B protein 42	Chorion protein		3
Msex2.08132	Chorion class B protein 43	Chorion protein		3
Msex2.02173	Chorion Protein Like 1	Chorion protein		3
Msex2.02172	Chorion Protein Like 2	Chorion protein		3
Msex2.03826	Chorion protein-Like	Chorion protein		3
Msex2.03662	Vitellogenin	Vitellogenin proteins		3
Msex2.10443	Vitellogenin 6-like	Vitellogenin proteins		3
Msex2.10094	Microvitellogenin-4	Vitellogenin proteins		3
References
1	Tetreau, G., X. Cao, Y. R. Chen, S. Muthukrishnan, H. Jiang et al., 2015a Overview of chitin metabolism enzymes in Manduca sexta: Identification, domain organization, phylogenetic analysis and gene expression. Insect Biochem. Mol. Biol. 62: 114–126.
2	Tetreau, G., N. T. Dittmer, X. Cao, S. Agrawal, Y. R. Chen et al., 2015b Analysis of chitin-binding proteins from Manduca sexta provides new insights into evolution of peritrophin A-type chitin-binding domains in insects. Insect Biochem. Mol. Biol. 62: 127-141.
3	Kanost, M. R., E. L. Arrese, X. Cao, Y. R. Chen, S. Chellapilla et al., 2016a Multifaceted biological insights from a draft genome sequence of the tobacco hornworm moth, Manduca sexta. Insect Biochem. Mol. Biol. 76: 118–147.
4	Cao, X., Y. He, Y. Hu, X. Zhang, Y. Wang et al., 2015a Sequence conservation, phylogenetic relationships, and expression profiles of nondigestive serine proteases and serine protease homologs in Manduca sexta. Insect Biochem. Mol. Biol. 62: 51–63.
5	Cao, X., Y. He, Y. Hu, Y. Wang, Y. R. Chen et al., 2015b The immune signalling pathways of Manduca sexta. Insect Biochem. Mol. Biol. 62: 64–74.
6	Jindra, M., F. Malone, K. Hiruma, and L. M. Riddiford, 1996 Developmental profiles and ecdysteroid regulation of the mRNAs for two ecdysone receptor isoforms in the epidermis and wings of the tobacco hornworm, Manduca sexta. Dev Biol, 180: 258–272.
7	Fujiwara, H., M. Jindra, R. Newitt, S. R. Palli, K. Hiruma, and L. M. Riddiford, 1995 Cloning of an ecdysone receptor homolog from Manduca sexta and the developmental profile of its mRNA in wings. Insect Biochem. Mol. Biol. 25: 845–856.
8	Jindra M, Huang JY, Malone F, Asahina M, Riddiford LM. 1997 Identification and mRNA developmental profiles of two ultraspiracle isoforms in the epidermis and wings of Manduca sexta. Insect Mol Biol. 6, 41–53. (doi: 10.1046/j.1365-2583.1997.00153.x)
9	Palli, S. R., K .Hiruma, and L. M. Riddiford, 1992 An ecdysteroid-inducible Manduca gene similar to the Drosophila DHR3 gene, a member of the steroid hormone receptor superfamily. Dev. Biol. 150: 306–318.
10	Weller, J., G. C. Sun, B. Zhou, Q. Lan, K. Hiruma, and L. M. Riddiford, 2001 Isolation and developmental expression of two nuclear receptors, MHR4 and betaFTZ-F1, in the tobacco hornworm, Manduca sexta. Insect Biochem. Mol. Biol. 31: 827–837.
11	Zhou, B., K. Hiruma, M. Jindra, T. Shinoda, W. A. Segraves et al., 1998a Regulation of the transcription factor E75 by 20-hydroxyecdysone and juvenile hormone in the epidermis of the tobacco hornworm, Manduca sexta, during larval molting and metamorphosis. Dev. Biol. 193: 127-138.
12	Hiruma, K., M. S. Carter, and L. M. Riddiford, 1995 Characterization of the dopa decarboxylase gene of Manduca sexta and its suppression by 20-hydroxyecdysone. Dev Biol, 169: 195–209. Hussain, M., and S. Asgari, 2014 MicroRNAs as mediators of insect host-pathogen interactions and immunity. J. Insect Physiol. 70: 151–158.
13	Zhou, B., K. Hiruma, T. Shinoda, and L. M. Riddiford, 1998b Juvenile hormone prevents ecdysteroid-induced expression of broad complex RNAs in the epidermis of the tobacco hornworm, Manduca sexta. Dev. Biol. 203: 233–244.
14	Segraves, W. A., and C. Woldin, 1993 The E75 gene of Manduca sexta and comparison with its Drosophila homolog. Insect Biochem. Mol. Biol. 23: 91–97.
15	Dubrovskaya, V. A., E. M. Berger, and E. B. Dubrovsky, 2004 Juvenile hormone regulation of the E75 nuclear receptor is conserved in Diptera and Lepidoptera. Gene 340: 171–177.
16	Stilwell, G. E., C. A. Nelson, J. Weller, H. Cui, K. Hiruma et al., 2003 E74 exhibits stage-specific hormonal regulation in the epidermis of the tobacco hornworm, Manduca sexta. Dev. Biol. 258: 76–90.
