# Supplementary material for: Complete Metamorphosis in Manduca sexta Involves Specific Changes in DNA Methylation Patterns
Source: Frontiers journal article supplement (doi:10.3389/fevo.2021.646281), 2021-03-11
Supplement: Table_2.XLSX [file Table_2.XLSX]

## Sheet: Tabelle1
Table S8. Expression and differential methylation profile of genes of interest.
Expression	Differential methylation	Number	Name	Function	Gene class	Reference
up	L_5mC	Msex2.02671	MsCDA4	Chitin deacetylase	Chitin metabolism	1
up	A_5mC	Msex2.08536	MsCDA7	Chitin deacetylase	Chitin metabolism	1
up	L_5mC	Msex2.06544	MsCHS2	Chitin synthase	Chitin metabolism	1
n.s.	A_5mC	Msex2.04654	MsCHT3	Chitinase	Chitin metabolism	1
up	L_5mC	Msex2.08807	MsCPAP3-D1	Chitin-binding protein	Chitin metabolism	2
up	L_5mC	Msex2.11956	MsPMP1-D	Chitin-binding protein	Chitin metabolism	2
up	L_5mC	Msex2.04629	MsPMP3-A	Chitin-binding protein	Chitin metabolism	2
up	A_5mC	Msex2.08805	MsCPAP3-A1	Chitin-binding protein	Chitin metabolism	2
up	A_5mC	Msex2.08806	MsCPAP3-A2	Chitin-binding protein	Chitin metabolism	2
up	A_5mC	Msex2.05978	MsPMP1-B	Chitin-binding protein	Chitin metabolism	2
up	A_5mC	Msex2.00706	MsPMP9-A	Chitin-binding protein	Chitin metabolism	2
down	A_5mC	Msex2.01581	A5	ABC transporter	Detoxification	3
n.s.	A_5mC	Msex2.12147	A3	ABC transporter	Detoxification	3
up	L_5mC	Msex2.09295	E1	ABCtransporter	Detoxification	3
up	L_5mC	Msex2.09797	C6	ABCtransporter	Detoxification	3
up	L_5mC	Msex2.10064	B8	ABCtransporter	Detoxification	3
down	A_5mC	Msex2.09851	G	ABCtransporter	Detoxification	3
down	A_5mC	Msex2.12844	B9	ABCtransporter	Detoxification	3
down	A_5mC	Msex2.02921	G	ABCtransporter	Detoxification	3
down	A_5mC	Msex2.05814	H	ABCtransporter	Detoxification	3
down	A_5mC	Msex2.06970	F2	ABCtransporter	Detoxification	3
up	A_5mC	Msex2.09773	B1	ABCtransporter	Detoxification	3
up	A_5mC	Msex2.12541	G	ABCtransporter	Detoxification	3
up	pL_5mC	Msex2.05815	H	ABCtransporter	Detoxification	3
down	L_5mC	Msex2.10891	CYP333B	Cytochrome P450	Detoxification	3
up	L_5mC	Msex2.00093	CYP428A	Cytochrome P450	Detoxification	3
up	L_5mC	Msex2.01884	CYP354A5	Cytochrome P450	Detoxification	3
up	mixed	Msex2.07258	CYP49A	Cytochrome P450	Detoxification	3
down	L_5mC	Msex2.04831	UGT46A5	UDP-glucuronosyltransferase	Detoxification	3
n.s.	L_5mC	Msex2.09880	UGT40L2	UDP-glucuronosyltransferase	Detoxification	3
n.s.	A_5mC	Msex2.11080	UGT340B1	UDP-glucuronosyltransferase	Detoxification	3
up	A_5mC	Msex2.00533	UGT42B3	UDP-glucuronosyltransferase	Detoxification	3
down	A_5mC	Msex2.14460	Cecropin13	Antimicrobial peptid	Immune response	3
down	L_5mC	Msex2.07946	Atg14	Autophagy	Immune response	4
down	L_5mC	Msex2.13198	Atg6	Autophagy	Immune response	4
down	A_5mC	Msex2.12227-RB	Atg8	Autophagy	Immune response	4
up	pA_5mC	Msex2.12227_RA	Atg8	Autophagy	Immune response	4
down	mixed	Msex2.06465	Vps34/IP3 kinase 59F	Autophagy	Immune response	4
up	A_5mC	Msex2.02637	Transferrin 1	Binding and removal of free ions	Immune response	3
down	L_5mC	Msex2.02727	ECSIT	C-Jun N-terminal kinase-mitogen-activated protein kinase pathway	Immune response	4
down	L_5mC	Msex2.08712	Polehole/MAPKKK	C-Jun N-terminal kinase-mitogen-activated protein kinase pathway	Immune response	4,3
up	L_5mC	Msex2.01399	Hemolin-LP2	C-Jun N-terminal kinase-mitogen-activated protein kinase pathway	Immune response	3
up	A_5mC	Msex2.04668	Cdc42	C-Jun N-terminal kinase-mitogen-activated protein kinase pathway	Immune response	4
down	mixed	Msex2.01572	Smrter	C-Jun N-terminal kinase-mitogen-activated protein kinase pathway	Immune response	4
n.s.	L_5mC	Msex2.06959	DNR1	Immune deficiency pathway	Immune response	4
down	A_5mC	Msex2.05604	IAP2	Immune deficiency pathway	Immune response	4
down	A_5mC	Msex2.08499	Caspar	Immune deficiency pathway	Immune response	4
up	A_5mC	Msex2.08004	Relish	Immune deficiency pathway	Immune response	4
up	L_5mC	Msex2.11527	PGRP-Lca/b/PGRP-12	Immune deficiency pathway/Microbial Recognition	Immune response	4,3
n.s.	L_5mC	Msex2.08880	JAK/Hopscotch	Januskinase-Signal Transducers and Activators of Transcription pathway	Immune response	4
n.s.	A_5mC	Msex2.09515	Stam	Januskinase-Signal Transducers and Activators of Transcription pathway	Immune response	4
up	A_5mC	Msex2.10552	STAT	Januskinase-Signal Transducers and Activators of Transcription pathway	Immune response	4
down	L_5mC	Msex2.09015	PGRP-08	Microbial Recognition	Immune response	3
up	L_5mC	Msex2.13829	BGRP3	Microbial Recognition	Immune response	3
up	A_5mC	Msex2.06179	MBP	Microbial Recognition	Immune response	3
up	A_5mC	Msex2.09398	PGRP-11	Microbial Recognition	Immune response	3
down	L_5mC	Msex2.00687	Nibbler	RNAi pathway	Immune response	4
down	L_5mC	Msex2.00855	CBC	RNAi pathway	Immune response	4
down	L_5mC	Msex2.04435	Ago3	RNAi pathway	Immune response	4
down	L_5mC	Msex2.05484	Armitage	RNAi pathway	Immune response	4
down	L_5mC	Msex2.10734	Dicer1	RNAi pathway	Immune response	4
down	L_5mC	Msex2.13345	Shu	RNAi pathway	Immune response	4
up	L_5mC	Msex2.05992	TSN	RNAi pathway	Immune response	4
down	A_5mC	Msex2.07859	piwi	RNAi pathway	Immune response	4
up	A_5mC	Msex2.05578	Ago2	RNAi pathway	Immune response	4
down	mixed	Msex2.00504	Drosha	RNAi pathway	Immune response	4
down	L_5mC	Msex2.02634	SP132	Serine protease	Immune response	5
n.s.	L_5mC	Msex2.12745	SP30	Serine protease	Immune response	5
up	L_5mC	Msex2.14074	SP31	Serine protease	Immune response	5
n.s.	L_5mC	Msex2.10838	HP20	Serine protease (hemolymph)	Immune response	5
up	L_5mC	Msex2.12750	HP14a	Serine protease (hemolymph)	Immune response	5
up	L_5mC	Msex2.04985	SPH145	Serine protease homolog	Immune response	5
up	L_5mC	Msex2.10840	SPH3/33	Serine protease homolog	Immune response	5
up	L_5mC	Msex2.01982	Serpent	Toll pathway	Immune response	4
up	L_5mC	Msex2.12079	MyD88	Toll pathway	Immune response	4
up	L_5mC	Msex2.12149	Toll5	Toll pathway	Immune response	4
down	A_5mC	Msex2.10593	Uba2	Toll pathway	Immune response	4
n.s.	A_5mC	Msex2.08663	Tube	Toll pathway	Immune response	4
n.s.	A_5mC	Msex2.08997	Lesswright	Toll pathway	Immune response	4
up	A_5mC	Msex2.03266	Smt3	Toll pathway	Immune response	4
up	A_5mC	Msex2.12985	Cactin	Toll pathway	Immune response	4
up	pL_5mC	Msex2.03458	aPKC-A/B	Toll pathway	Immune response	4
down	L_5mC	Msex2.04669	HAT	Histone acetyltransferase	Epigenetic modification	3
down	pL_5mC	Msex2.05200	HAT	Histone acetyltransferase	Epigenetic modification	3
down	L_5mC	Msex2.07499	HDAC	Histone deacetylase	Epigenetic modification	3
down	A_5mC	Msex2.12314	HDAC	Histone deacetylase	Epigenetic modification	3
n.s.	L_5mC	Msex2.04789	betaFTZ-F1	Ecdysteroid-induced trancription factor	Juvenile hormone and ecdoysone regulated pathways	10
up	L_5mC	Msex2.08701	E74B	Juvenile hormone/ ecdysone-induced transcription factor	Juvenile hormone and ecdoysone regulated pathways	16
References
1	Tetreau, G., X. Cao, Y. R. Chen, S. Muthukrishnan, H. Jiang et al., 2015a Overview of chitin metabolism enzymes in Manduca sexta: Identification, domain organization, phylogenetic analysis and gene expression. Insect Biochem. Mol. Biol. 62: 114–126.
2	Tetreau, G., N. T. Dittmer, X. Cao, S. Agrawal, Y. R. Chen et al., 2015b Analysis of chitin-binding proteins from Manduca sexta provides new insights into evolution of peritrophin A-type chitin-binding domains in insects. Insect Biochem. Mol. Biol. 62: 127-141.
3	Kanost, M. R., E. L. Arrese, X. Cao, Y. R. Chen, S. Chellapilla et al., 2016a Multifaceted biological insights from a draft genome sequence of the tobacco hornworm moth, Manduca sexta. Insect Biochem. Mol. Biol. 76: 118–147.
4	Cao, X., Y. He, Y. Hu, X. Zhang, Y. Wang et al., 2015a Sequence conservation, phylogenetic relationships, and expression profiles of nondigestive serine proteases and serine protease homologs in Manduca sexta. Insect Biochem. Mol. Biol. 62: 51–63.
5	Cao, X., Y. He, Y. Hu, Y. Wang, Y. R. Chen et al., 2015b The immune signalling pathways of Manduca sexta. Insect Biochem. Mol. Biol. 62: 64–74.
6	Jindra, M., F. Malone, K. Hiruma, and L. M. Riddiford, 1996 Developmental profiles and ecdysteroid regulation of the mRNAs for two ecdysone receptor isoforms in the epidermis and wings of the tobacco hornworm, Manduca sexta. Dev Biol, 180: 258–272.
7	Fujiwara, H., M. Jindra, R. Newitt, S. R. Palli, K. Hiruma, and L. M. Riddiford, 1995 Cloning of an ecdysone receptor homolog from Manduca sexta and the developmental profile of its mRNA in wings. Insect Biochem. Mol. Biol. 25: 845–856.
8	Jindra M, Huang JY, Malone F, Asahina M, Riddiford LM. 1997 Identification and mRNA developmental profiles of two ultraspiracle isoforms in the epidermis and wings of Manduca sexta. Insect Mol Biol. 6, 41–53. (doi: 10.1046/j.1365-2583.1997.00153.x)
9	Palli, S. R., K .Hiruma, and L. M. Riddiford, 1992 An ecdysteroid-inducible Manduca gene similar to the Drosophila DHR3 gene, a member of the steroid hormone receptor superfamily. Dev. Biol. 150: 306–318.
10	Weller, J., G. C. Sun, B. Zhou, Q. Lan, K. Hiruma, and L. M. Riddiford, 2001 Isolation and developmental expression of two nuclear receptors, MHR4 and betaFTZ-F1, in the tobacco hornworm, Manduca sexta. Insect Biochem. Mol. Biol. 31: 827–837.
11	Zhou, B., K. Hiruma, M. Jindra, T. Shinoda, W. A. Segraves et al., 1998a Regulation of the transcription factor E75 by 20-hydroxyecdysone and juvenile hormone in the epidermis of the tobacco hornworm, Manduca sexta, during larval molting and metamorphosis. Dev. Biol. 193: 127-138.
12	Hiruma, K., M. S. Carter, and L. M. Riddiford, 1995 Characterization of the dopa decarboxylase gene of Manduca sexta and its suppression by 20-hydroxyecdysone. Dev Biol, 169: 195–209. Hussain, M., and S. Asgari, 2014 MicroRNAs as mediators of insect host-pathogen interactions and immunity. J. Insect Physiol. 70: 151–158.
13	Zhou, B., K. Hiruma, T. Shinoda, and L. M. Riddiford, 1998b Juvenile hormone prevents ecdysteroid-induced expression of broad complex RNAs in the epidermis of the tobacco hornworm, Manduca sexta. Dev. Biol. 203: 233–244.
14	Segraves, W. A., and C. Woldin, 1993 The E75 gene of Manduca sexta and comparison with its Drosophila homolog. Insect Biochem. Mol. Biol. 23: 91–97.
15	Dubrovskaya, V. A., E. M. Berger, and E. B. Dubrovsky, 2004 Juvenile hormone regulation of the E75 nuclear receptor is conserved in Diptera and Lepidoptera. Gene 340: 171–177.
16	Stilwell, G. E., C. A. Nelson, J. Weller, H. Cui, K. Hiruma et al., 2003 E74 exhibits stage-specific hormonal regulation in the epidermis of the tobacco hornworm, Manduca sexta. Dev. Biol. 258: 76–90.
